# Supplementary material
Source: PubMed Central journal article supplement (PMC3009782)
Supplement: 1009284107_pnas.201009284SI.pdf [file 1009284107_pnas.201009284SI.pdf]

# Supporting Information

Heyse et al. 10.1073/pnas.1009284107

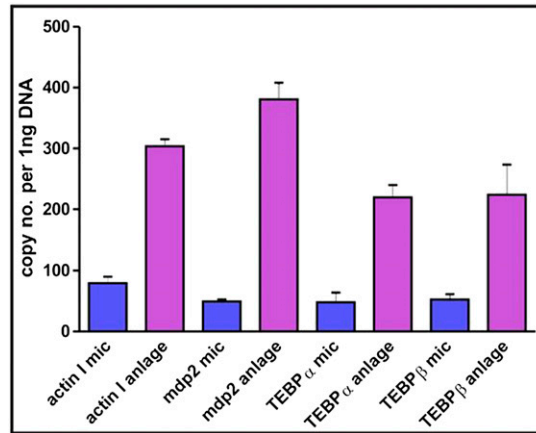

**Fig. S1.** Gene copy numbers in micronuclei and macronuclear anlagen of *Stylonychia*. DNA from micronuclei and macronuclear anlagen in the early polytene chromosome stage (Fig. 1) was isolated as described by Ammermann et al. (1), and the copy number of four genes (encoding actin I, mdp2, TEBP $\alpha$ , and TEBP $\beta$ ) was determined by qRT-PCR. To avoid amplification of possible contaminating macronuclear DNA, micronucleus-specific primers were used (Table S1 and Fig. S2). In *Stylonychia*, only ~30% of micronuclear chromosomes enter the first DNA amplification stage; the kinetic complexity of macronuclear anlagen DNA in the polytene chromosome stage is substantially reduced compared with that in micronuclear DNA (1), explaining why copy number/ng DNA in the macronuclear anlagen is higher than in micronuclear DNA. Because the DNA isolated from anlagen DNA is always derived from nuclei with variable polyteny, no exact copy number/nucleus can be given. As expected, in micronuclei, the estimated copy number corresponds to approximately one to two gene copies per micronucleus. All MDS are found in both nuclei in about equimolar amounts; the situation in the macronucleus is not mirrored, demonstrating that selective amplification does not occur during the first DNA amplification stage. Blue indicates copy number/ng in micronuclear DNA; purple indicates copy number/ng in anlagen DNA.

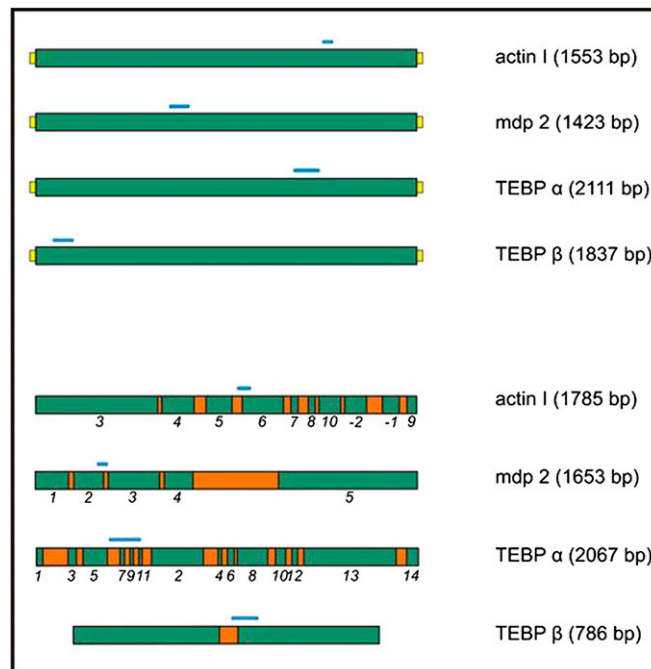

**Fig. S2.** Schematic illustration of macronuclear and micronuclear versions of four *Stylonychia* genes. MDSs are shown in green and are numbered according to their positions in the macronucleus. IESs are depicted in orange and telomeres in yellow. Blue bars indicate positions of qRT-PCR fragments. Primer pairs for amplification of micronuclear or anlagen DNA (Lower) were selected to amplify a micronucleus-specific fragment, and therefore always one primer is located in an IES. Total length of gene sequences in the macronucleus (Upper) or micronucleus (Lower) are given in brackets.

1. Ammermann D, Steinbrück G, von Berger L, Hennig W (1974) The development of the macronucleus in the ciliated protozoan *Stylonychia mytilus*. *Chromosoma* 45:401–429.

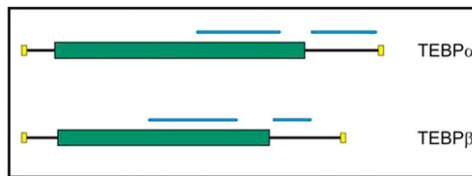

**Fig. S3.** Schematic illustration of DNA sequences used for RNAi experiments. Macronuclear versions of the *tebpα* and *β* nanochromosomes are depicted. Partial sequences of both genes were amplified and cloned into the vector L4440, which produces dsRNA of the inserted sequence. Bacteria expressing this dsRNA were fed to *Stylonychia* cells to induce RNAi. The coding region of each gene is shown in green; the untranslated regions are shown as black bars with attached telomeric sequences (yellow). Blue bars represent the part of the gene from which dsRNA was produced. For each gene, one sequence was taken from the coding region and one sequence from the 3'untranslated region.

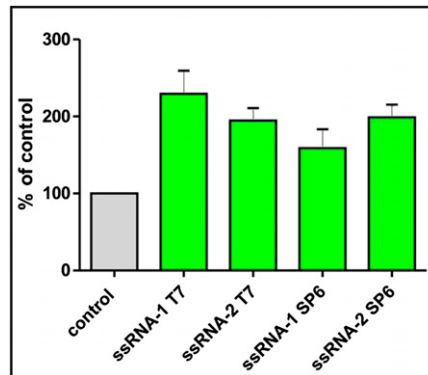

**Fig. S4.** Increase in copy numbers of the *actin I* nanochromosome after microinjection of ssRNA. Columns show the increase in copy numbers after injection of *actin I* template molecules. Here, ssRNA was injected into early exconjugant cells. Both orientations (transcribed with either T7 or SP6 RNA polymerase) were tested in different injection experiments; for each orientation, two clones are shown ("ssRNA-1 or -2"). "Control" cells were selected from a population of cells that were not injected but did conjugate. This control was set to 100%.  $n = 12$ . Error bars represent SD.

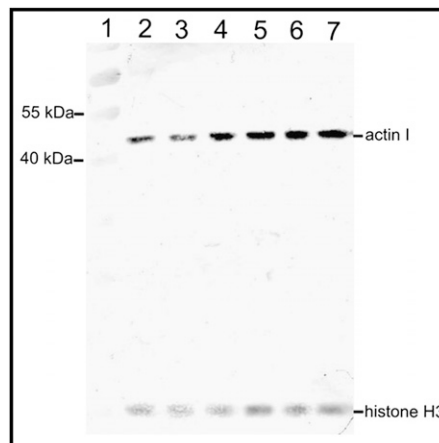

**Fig. S5.** Quantitative Western blot analysis of the actin I protein after template injection. After injection of *actin I* templates and several vegetative cell divisions, whole proteins of 200 cells per slot were separated by SDS/PAGE. Western blot analysis was then performed as previously described (1). Actin was stained by using a polyclonal anti- $\beta$ -actin antibody (Abcam); as an internal control, histone H3 was stained using a polyclonal antihistone H3 antibody (Santa Cruz Biotechnologies). Lane 1 represents prestained protein marker (Fermentas); lane 2, control cells; lane 3, control cells injected with Pringsheim solution; lanes 4–7, cells after injection of DNA- (lane 4) and ssRNA-template (lanes 5–7). In lanes 5–7, cells of three independent injection experiments are shown.

1. Jönsson F, Postberg J, Schaffitzel C, Lipps HJ (2002) Organization of the macronuclear gene-sized pieces of stichotrichous ciliates into a higher order structure via telomere-matrix interactions. *Chromosome Res* 10:445–453.

**Table S1. Primer sequences used in the experiments described**

| Purpose                    | Target/primer                | Sequence 5' to 3'                          |
|----------------------------|------------------------------|--------------------------------------------|
| <b>MAC qRT-PCR</b>         |                              |                                            |
|                            | Hsp70Mac-for-1               | AAGTTTGGAGTGTTCGAAATTGA                    |
|                            | Hsp70Mac-rev-1               | GACATGGCCGAGAGGTCTTA                       |
|                            | Hsp70Mac-for-2               | AACGCCAGAGCTCTCAGAAG                       |
|                            | Hsp70Mac-rev-2               | CTTGGCTCTTGAGATTTGGG                       |
|                            | TEBP $\beta$ Mac-for-1       | CAACAATGAGCAAGGGTCAA                       |
|                            | TEBP $\beta$ Mac-rev-1       | GCCTTGAAACCTTGTGAA                         |
|                            | TEBP $\beta$ Mac-for-2       | TTCTTCAACCAAGGCGGTGA                       |
|                            | TEBP $\beta$ Mac-rev-2       | CGATGTTGACGTTGCGGAAC                       |
|                            | TEBP $\alpha$ Mac-for        | GCTCTTAAACTCAAGTCCACAC                     |
|                            | TEBP $\alpha$ Mac-rev        | TTTGAAGCACTGACGAAGTAACAA                   |
|                            | Mdp2Mac-for                  | GCAGGCTTTTGAGAAAACA                        |
|                            | Mdp2Mac-rev                  | ATGCAGCATTCTAGCCTCA                        |
|                            | PiwiMac-for                  | TCACTCATGAGAGGATTGAGATTCGA                 |
|                            | PiwiMac-rev                  | CTAGTGAGTGAGCTTTTGACAGAGTTG                |
|                            | DNAPol $\alpha$ Mac-for      | GAAAATCGGCTAAAAATCAGGTG                    |
|                            | DNAPol $\alpha$ Mac-rev      | TCCACCCTCTAGCAGCT                          |
|                            | ActinIMac-for                | TTGCTGGCGAAGTTGAGAG                        |
|                            | ActinIMac-rev                | TGCCAGCCCAGACAGAAGAT                       |
|                            | rDNAMac-for-1                | CTGGTTGATCCTGCCAGTAG                       |
|                            | rDNAMac-rev-1                | CCACGGTTATCCATGTAAATTC                     |
|                            | rDNAMac-for-2                | CTCCTTTGTTGGTTTGAGGG                       |
|                            | rDNAMac-rev-2                | AACATCCTTGCCAAATGCTT                       |
|                            | 1.1kb gene Mac-for-1         | AACAGCCTATCCCCCTGAT                        |
|                            | 1.1kb gene Mac-rev-1         | GTGTCAACGCCGAAGAATTT                       |
|                            | 1.1kb gene Mac-for-2         | ACATCGCAATTGTGCCAGA                        |
|                            | 1.1kb gene Mac-rev-2         | CCAGATCGTCTGTTTTGGTC                       |
| <b>MIC+Anlagen qRT-PCR</b> |                              |                                            |
|                            | ActinIMic-for                | TTGATTGGAGTTAATGATTGGTG                    |
|                            | ActinIMic-rev                | TGGACTTTGGTGCTCTGTTTT                      |
|                            | Mdp2Mic-for                  | ACTCACAGCAAGGGGGATA                        |
|                            | Mdp2Mic-rev                  | CTGGCTAAAAATAAAAATATATCTCC                 |
|                            | TEBP $\beta$ Mic-for         | GAATCTATATTGCATTGACTATA                    |
|                            | TEBP $\beta$ Mic-rev         | TTTGAGATATCTGGAAGTGACTCTTA                 |
|                            | TEBP $\alpha$ Mic-for        | CCATTCGTTTGTCAATTTGTTACTTATAAATTAAATTATATC |
|                            | TEBP $\alpha$ Mic-rev        | AAGTAGCTGATCTAATTCTAACAA                   |
| <b>Cloning standards</b>   |                              |                                            |
|                            | Hsp70Mac-for-1               | AAGTTTGGAGTGTTCGAAATTGA                    |
|                            | Hsp70clo-rev                 | CATACCGCCTGGCATTG                          |
|                            | TEBP $\beta$ Mac/(Mic)-for-1 | CAACAATGAGCAAGGGTCAA                       |
|                            | TEBP $\beta$ cloMac-rev      | CTCCTTTGACCTTTGGTTGA                       |
|                            | TEBP $\beta$ cloMic-rev      | TTCTGCTTGATGGCTTGTG                        |
|                            | TEBP $\alpha$ cloMac-for     | TTATTGGTAGTCGTTAGATTCAAG                   |
|                            | TEBP $\alpha$ cloMic-for     | CCATTCGTTTGTCAATTTGTTACTTATAAATTAAATTATATC |
|                            | TEBP $\alpha$ clo-rev        | GTAAGGAGTTCGTTGTATTCTCTCGAG                |
|                            | Mdp2clo-for                  | CTCACTAATGAATTCGAGGTTGAG                   |
|                            | Mdp2clo-rev                  | ATCAGTCTCTGAGGGAAATAGGC                    |
|                            | Piwiclo-for                  | CCGTAGTTTCAGAATTCGACAGG                    |
|                            | Piwiclo-rev                  | TTTGGTGGCTAACCATTTAAGAAA                   |
|                            | DNAPol $\alpha$ clo-for      | TCATCCAGCAGGGACCTTTA                       |
|                            | DNAPol $\alpha$ clo-rev      | TTCTTTTACCGCCAACCTC                        |
|                            | ActinIclo-for                | CAATCGTTGGTAGACCCAAGAAC                    |
|                            | ActinIclo-rev                | AGCAAGGATATTTAAGTAAGGGC                    |
|                            | rDNAMac-for-1                | CTGGTTGATCCTGCCAGTAG                       |
|                            | rDNAclo-rev                  | GGTTCACCTACGGAAACCTTG                      |
|                            | 1.1kb gene clo-for           | GGCTACACTGGCCAGGTTG                        |
|                            | 1.1kb gene clo-rev           | CCTTCAAAAATATATACTATATTTGAAATAC            |
| <b>Cloning RNAi coding</b> |                              |                                            |
|                            | TEBP $\alpha$ Mac-for        | GCTCTTAAACTCAAGTCCACAC                     |
|                            | TEBP $\alpha$ RNAi-rev       | CTAGGTGTAGAGGAGAATTCGTGA                   |
|                            | TEBP $\beta$ RNAi-for        | GCATCAAGCTTGATATCTCAAAGCTCTCTGG            |
|                            | TEBP $\beta$ RNAi-rev        | GGTAACTCGAGCCATTGTCAATTTGATCAGTG           |

**Table S1. Cont.**

| Purpose            | Target/primer             | Sequence 5' to 3'                     |
|--------------------|---------------------------|---------------------------------------|
| Cloning RNAi 3'UTR | TEBP $\alpha$ 3' RNAi-for | GCGAAGCTTCGATTTTGAAAACCATAAAAAG       |
|                    | TEBP $\alpha$ 3' RNAi-rev | GAACTCGAGACCAGATTTAACTCGAAGATG        |
|                    | TEBP $\beta$ 3' RNAi-for  | CCTAATTCCTCGTGTGATAAATGC              |
|                    | TEBP $\beta$ 3' RNAi-rev  | CATTATACCTCATTGAACGAGCTT              |
| Cloning injections | Actin I P5' tel           | AAAACCCCTATAGAGAGTATTAGATGTATTGATTAGG |
|                    | Actin I P3' tel           | AAAACCCCATTTGATGGAATTTAGTATAAATAAGTGG |

**Table S2. Nucleotide sequences clones into vector L4440 and used in RNAi experiments**

| Source of fragment for RNAi                  | Primers                                               | Sequence 5' to 3'                                                                                                                                                                                                                                                                                                                                                                                                                                                                                                                                                                                                     |
|----------------------------------------------|-------------------------------------------------------|-----------------------------------------------------------------------------------------------------------------------------------------------------------------------------------------------------------------------------------------------------------------------------------------------------------------------------------------------------------------------------------------------------------------------------------------------------------------------------------------------------------------------------------------------------------------------------------------------------------------------|
| <i>tebp<math>\alpha</math></i> coding region | TEBP $\alpha$ Mac-for x TEBP $\alpha$ RNAi-rev        | GCTCTTAAACTCAAGTCCACACTTGAGAGCTGGAGA<br>AGTTGTTAGAATTAGATCAGCTACTTATGATGAGACCT<br>CAACCCAAAAGAAGGTCTCTTCTAAGTCACTACTCC<br>AACATTGTTACCTTCGTAAGTGCTTCAAAGCTTGCCAA<br>GGAAATCAAGGGTAAAGTCACTGATGATAAATCAGTTG<br>AGAAGGCTGCACTCAAGCAAGATGTTAGCTTGAGCGT<br>TGTCGTCTCACTGAAGTCGACAAGAAGCATGTGGT<br>CTCCCAACCCACTCACTTCAAGATTTATTCCACAACGC<br>TGATACTGATAAGGAAATCTCAAGCAAAGACACCTTCA<br>GAACTCAATTCTACATTACCAGAGTTGAACCAAGTTGAT<br>GTTAAGGAATGGGTTAAGTCATATGACAGAAAATCAAA<br>GAAGGCTCATCCACAAGGGTGCTGCAGCCAAGAGT<br>GGAGAGAACATTTTCAAGTTCAATTCCTCGTCAAGGA<br>TGCTCAACTCACTTAAACAACAACACCTACAGAATTC<br>TCCTCTACACCTAG        |
| <i>tebp<math>\alpha</math></i> 3'UTR         | TEBP $\alpha$ 3' RNAi-for x TEBP $\alpha$ 3' RNAi-rev | GCGAAGCTTCGATTTTGAAAACCATAAAAAGTTAAGTA<br>ATGAAACCTAATGATTATTATATCTTCTTATAAAAAGTTAA<br>AAACTACTCCTAAGCTCTTAAATTCAATTTTTAAACTTA<br>AAATTCAAAAAGTAATTAATAATCCTTGTAGGAATTTA<br>ATTTGATTCATGAACCTGTTATATATTATGATTAGTAAC<br>TTTGAAGTTAATAAGTTTTCTAGCAGCCTAATCATTCT<br>ATATTCATGCTTTAATAACCTAAATTGGGGAAATTTAT<br>TGCTATTTCAAGGAGACTATTCTGTATATTGTAAATA<br>TAAGTTGAAATTTGTATAAATAAATGAGAAATAGCCTTA<br>GTAATTATCAATACCCATCTTCGAGTTAAATCTGGTCTC<br>GAGTTC                                                                                                                                                                      |
| <i>tebp<math>\beta</math></i> coding region  | TEBP $\beta$ RNAi-for x TEBP $\beta$ RNAi-rev         | GCATCAAGCTTGATATCTCAAAGCTCTGCTGCTGAT<br>GCTGCTGGCAAGAAGACCAAGGTCGATGGAGGTATTG<br>TTAAAACCGGTGCTTCCAAGGGTGACGAGTTCGCAGA<br>CTTCTATTCAAGGAGGGCAGCACTGCCGTTCTCAAG<br>ATCCAAGACATCTTGTCCAAGAGAAAGGCAAAGATGC<br>TCTTAAGAGAATTCAAGATGCTCAAGTCGACAGCGTTC<br>AAGCCCAACCAAAGTTAAGGGAGGTGCTAAAGGCAA<br>GAAGAAGGCCGCCACCAAGTCAGCCACCAAGAAGACT<br>GTTGCTGCCAAGAAAAGTCCGAGTCTGCTGACGTTA<br>GAAAGAGCGTTGACAAGATCGTTAAATATACTCCTAAC<br>AAGCCATCAAGCAGAAAGGAGACCCATAAAAAGAGCC<br>AATCTGCTCCAGCTGCTGGCAAGTCATCAGCCAAGAG<br>AACCACCACCGGCTCAAAGACCAAGATCCCAGCCAAC<br>CCATCCCAAGCGGAAAGAAGTCAACCAAGACCACTG<br>ATCAATGACAATGGCTCGAGTTACCA |
| <i>tebp<math>\beta</math></i> 3'UTR          | TEBP $\beta$ 3' RNAi-for x TEBP $\beta$ 3' RNAi-rev   | TCCTAATTCCTCGTGTGATAAATGCTGATGTTATTATAC<br>TAATTCTCTTAAATGAGATTTTTCATAACACTTAAAAAAA<br>CTCAGTTTCTTAACTCACAAAATATTCATGATGATTTT<br>TGAATGGCTGGCTATTCTGGTATTCTAGAATAGGCTAT<br>TCAGGATGACACTAATTTAAATTTAAGTCTCAATCAC<br>ATTCAATTTAAAGCTCGTTCAATGAGGTATAATG                                                                                                                                                                                                                                                                                                                                                                |
